# Supplementary material
Source: publisher site journal article supplement (https://www.spandidos-publications.com/4831/downloadSupplementary)

Figure S1. The variations in the *SCN9A* and *LFNG* genes that were harbored by the affected child in Case 2.

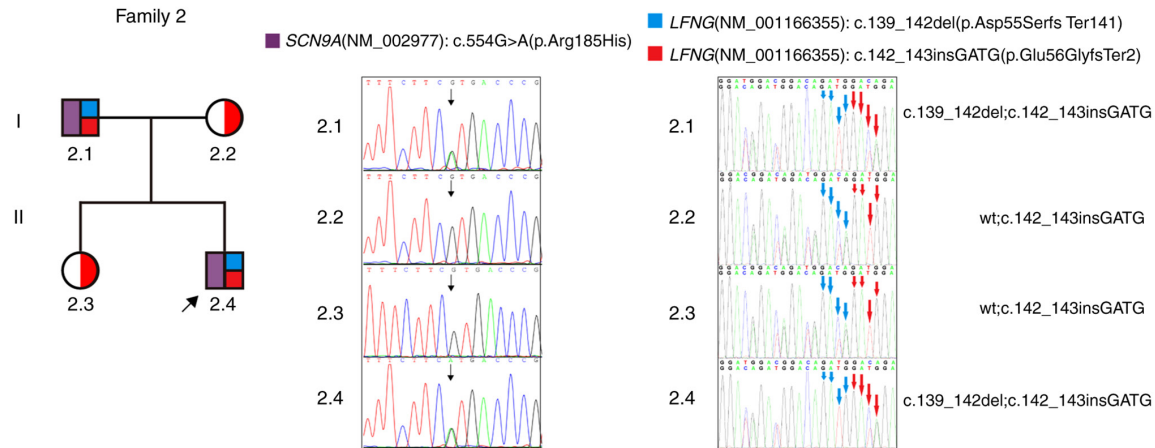

Supplement: Supplementary file 1 [file downloadSupplementary]
